# Supplementary material for: Optimization of spray-coated nanochitin/nanocellulose films as renewable oxygen barrier layers via thermal treatment
Source: Royal Society of Chemistry journal article supplement (doi:10.1039/d2ma00832g), 2022-01-01
Supplement: d2ma00832g1.pdf [file d2ma00832g1.pdf]

## Supplementary Information

### Optimization of spray-coated nanochitin/nanocellulose films as renewable oxygen barrier layers via thermal treatment

*Yue Ji,<sup>1</sup> D. Eric Shen,<sup>2,3</sup> Elizabeth K. Young,<sup>4</sup> Callie L. Goins,<sup>2</sup> John R. Reynolds,<sup>2,3,4</sup> Meisha L. Shofner,<sup>4,5</sup> J. Carson Meredith\*<sup>1,5</sup>*

<sup>1</sup> School of Chemical & Biomolecular Engineering, Georgia Institute of Technology, Atlanta, GA 30332, USA

<sup>2</sup> School of Chemistry and Biochemistry, Georgia Institute of Technology, Atlanta, GA 30332, USA

<sup>3</sup> Center for Organic Photonics and Electronics, Georgia Tech Polymer Network, Georgia Institute of Technology, Atlanta, GA 30332, USA

<sup>4</sup> School of Materials Science and Engineering, Georgia Institute of Technology, Atlanta, GA 30332, USA

<sup>5</sup> Renewable Bioproducts Institute, Georgia Institute of Technology, Atlanta, GA 30332, USA

\*Corresponding author: [carson.meredith@chbe.gatech.edu](mailto:carson.meredith@chbe.gatech.edu)

Number of pages: 18

Number of figures: 7

Number of tables: 14

## Table of Contents

|                                                                                                                                                                       |    |
|-----------------------------------------------------------------------------------------------------------------------------------------------------------------------|----|
| Table S1. Properties of cellulose acetate substrate. ....                                                                                                             | 3  |
| Table S2. Properties of chitin nanowhisiker suspension.....                                                                                                           | 3  |
| Table S3. Properties of cellulose nanocrystal suspension. ....                                                                                                        | 3  |
| Characterizations of chitin nanowhisiker and cellulose nanocrystal suspensions .....                                                                                  | 4  |
| Figure S1. Schematic of the spray coating setup. ....                                                                                                                 | 5  |
| Figure S2. Cross-sectional SEM images for ChNW-CNC coatings with an exposed CA top surface. ....                                                                      | 6  |
| Table S4. Oxygen permeabilities of CA films treated under different conditions. ....                                                                                  | 7  |
| Figure S3. Moisture content of ChNW-CNC coating for films prepared at different spray coating temperatures and thermal treatment temperatures determined by TGA. .... | 7  |
| Table S5. Oxygen and water vapor properties of common plastics for food packaging applications versus the coated film S80T140. ....                                   | 8  |
| Table S6. Densities of selected coated CA films before and after six months of conditioning at room temperature and ~53% RH. ....                                     | 8  |
| Table S7. Water contact angle on untreated CA and coated films. ....                                                                                                  | 8  |
| Figure S4. Selected stress-strain curves and force-penetration for untreated CA and coated CA films with different spray coating temperatures. ....                   | 9  |
| Figure S5. Selected stress-strain curves and force-penetration for untreated CA and coated CA films with different thermal treatment temperatures. ....               | 9  |
| Table S8. Two tailed P-values for mean breaking force.....                                                                                                            | 10 |
| Table S9. Two tailed P-values for mean modulus. ....                                                                                                                  | 11 |
| Table S10. Two tailed P-values for mean yield stress. ....                                                                                                            | 12 |
| Table S11. Two tailed P-values for mean strain at break. ....                                                                                                         | 13 |
| Table S12. Mechanical properties of uncoated CA films treated under different conditions.....                                                                         | 14 |
| Supplementary analysis on mechanical properties .....                                                                                                                 | 14 |
| Table S13. Mechanical properties of common plastics for food packaging applications versus the coated film S80140. ....                                               | 15 |
| Figure S6. Optical microscope images for untreated CA and coated CA films. Scale bars: 500 $\mu\text{m}$ . ....                                                       | 16 |
| Figure S7. Root-mean-square roughness of surfaces of the untreated CA and coated CA films determined by profilometry. ....                                            | 17 |
| Table S14. Optical properties of common plastics for food packaging applications versus the coated film S80T140.....                                                  | 17 |
| References.....                                                                                                                                                       | 17 |

**Table S1. Properties of cellulose acetate substrate.**

|                              |                          |
|------------------------------|--------------------------|
| Degree of substitution       | 2.1-2.4 <sup>a</sup>     |
| Degree of polymerization     | 145-190 <sup>a</sup>     |
| Thickness (μm)               | 76 ± 1                   |
| Density (g/cm <sup>3</sup> ) | 1.23 ± 0.10 <sup>b</sup> |

<sup>a</sup> Data available in Ref 1.

<sup>b</sup> Density was measured by displacement (ASTM D792) in triplicate by using isopropyl alcohol.

**Table S2. Properties of chitin nanowhisker suspension.**

|                                      |            |
|--------------------------------------|------------|
| Concentration (wt %)                 | 0.5        |
| Length (nm)                          | 112 ± 53   |
| Width (nm)                           | 4.4 ± 0.9  |
| Degree of acetylation (%)            | 62.4 ± 4.8 |
| Viscosity @ 300 s <sup>-1</sup> (cP) | 5.3        |

**Table S3. Properties of cellulose nanocrystal suspension.**

|                                      |           |
|--------------------------------------|-----------|
| Concentration (wt %)                 | 0.5       |
| Length (nm)                          | 134 ± 41  |
| Width (nm)                           | 6.0 ± 2.6 |
| Sulfur content (mmol/g-dry-CNC)      | 1.06      |
| Viscosity @ 300 s <sup>-1</sup> (cP) | 1.3       |

## **Characterizations of chitin nanowhisker and cellulose nanocrystal suspensions**

Dimensions of ChNWs and CNCs were measured by atomic force microscopy (AFM; Dimension XR, Bruker, UK) at 0.990 Hz.<sup>2</sup> The suspensions were diluted to 0.001 wt% by adding pH 3 HOAc solution (for ChNW) or deionized water (for CNC), cast on silicon wafer, dried at 70 °C, and conditioned under room atmosphere overnight before characterization. At least 100 nanowhiskers or nanocrystals were selected randomly to obtain the size distribution.

The degree of acetylation of ChNW was characterized by potentiometric titration as previously reported.<sup>2</sup> Briefly, ChNW suspension was treated with anion exchange resin (Amberlite IRN-78, Alfa Aesar, USA), washed with water, acidified with hydrochloric acid solution, and titrated against NaOH solution.

The viscosities of 0.5 wt% ChNW and 0.5 wt% CNC were characterized using a rheometer (MCR 302, Anton Paar, USA) at 23 °C using a cone-plate geometry.<sup>3</sup> The cone had a diameter of 50 mm, cone angle of 1.01°, and truncation of 0.053 mm, and the bottom plate insert was 60 mm in diameter.

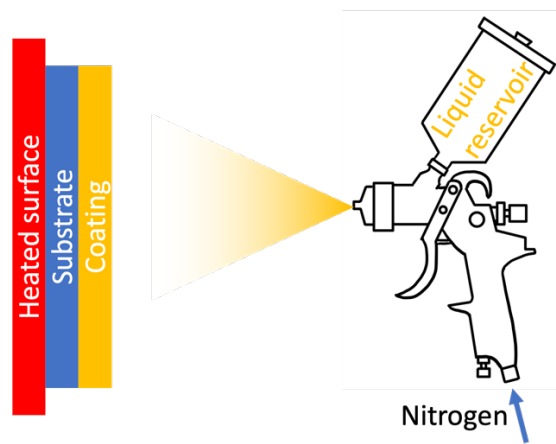

**Figure S1. Schematic of the spray coating setup.**

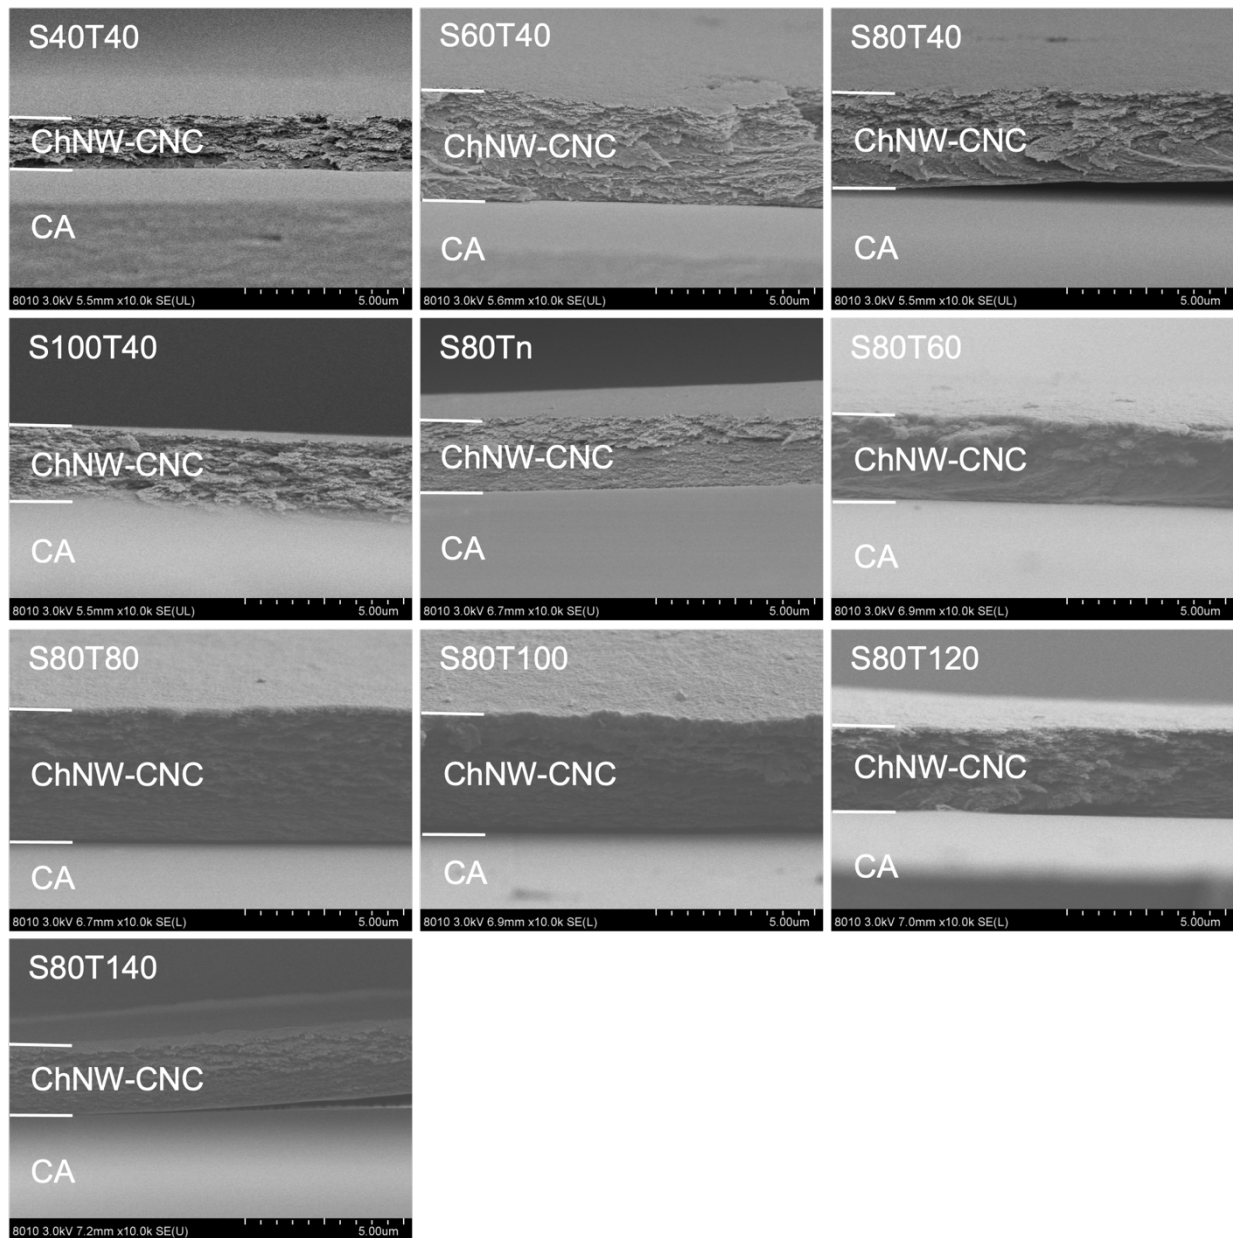

**Figure S2. Cross-sectional SEM images for ChNW-CNC coatings with an exposed CA top surface.**

**Table S4. Oxygen permeabilities of CA films treated under different conditions.**

| Sample | Oxygen permeability<br>( $\text{cm}^3 \cdot \mu\text{m}/\text{m}^2/\text{day}/\text{kPa}$ ) |
|--------|---------------------------------------------------------------------------------------------|
| CAS40  | $526 \pm 10$                                                                                |
| CAS60  | $498 \pm 7$                                                                                 |
| CAS80  | $496 \pm 7$                                                                                 |
| CAS100 | $504 \pm 8$                                                                                 |
| CAT40  | $557 \pm 8$                                                                                 |
| CAT60  | $606 \pm 9$                                                                                 |
| CAT80  | $499 \pm 7$                                                                                 |
| CAT100 | $584 \pm 16$                                                                                |
| CAT120 | $533 \pm 7$                                                                                 |
| CAT140 | $546 \pm 8$                                                                                 |

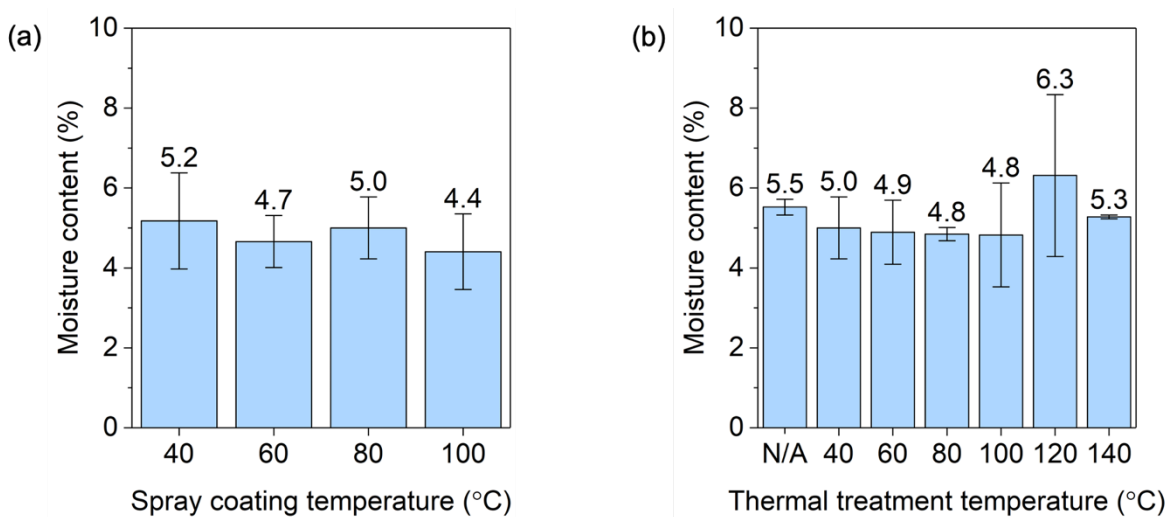

**Figure S3. Moisture content of ChNW-CNC coating for films prepared at different spray coating temperatures (a) and thermal treatment temperatures (b) determined by TGA. ‘N/A’ represents sample S80Tn without being thermally treated.**

**Table S5. Oxygen and water vapor properties of common plastics for food packaging applications versus the coated film S80T140.**

| Film               | Oxygen permeability <sup>a</sup><br>(cm <sup>3</sup> ·μm/m <sup>2</sup> /day/kPa) | Water vapor transmission rate <sup>b</sup><br>(g·μm/m <sup>2</sup> /day) |
|--------------------|-----------------------------------------------------------------------------------|--------------------------------------------------------------------------|
| PE <sup>4</sup>    | 500-2000                                                                          | 0.5-2                                                                    |
| PS <sup>4</sup>    | 1000-1500                                                                         | 1-4                                                                      |
| PP <sup>4</sup>    | 500-1000                                                                          | 0.2-0.4                                                                  |
| PVC <sup>4</sup>   | 20-80                                                                             | 1-2                                                                      |
| PLA <sup>5,6</sup> | 70-1300                                                                           | 2.2                                                                      |
| PET <sup>4</sup>   | 10-50                                                                             | 0.5-2                                                                    |
| CA                 | 535 ± 38                                                                          | 8.3 ± 0.1                                                                |
| S80T140            | 11.5 ± 0.9                                                                        | 6600 ± 100                                                               |

<sup>a</sup> The oxygen permeability values were all obtained at 23 °C and 50% RH.

<sup>b</sup> The water vapor transmission rate values for PE, PS, PP, PVC, and PET were obtained at 23 °C and 85% RH, while the values for PLA, CA, and S80T140 were obtained at 23 °C and 50% RH.

**Table S6. Densities of selected coated CA films before and after six months of conditioning at room temperature and ~53% RH.**

| Sample  | Density (g/cm <sup>3</sup> ) |             |
|---------|------------------------------|-------------|
|         | Before                       | After       |
| S40T40  | 1.13 ± 0.07                  | 1.20 ± 0.04 |
| S80T140 | 1.13 ± 0.07                  | 1.26 ± 0.08 |

**Table S7. Water contact angle on untreated CA and coated films.**

|         | Water contact angle (°) |
|---------|-------------------------|
| CA      | 65.0 ± 1.5              |
| S40T40  | 49.8 ± 4.5              |
| S60T40  | 42.2 ± 4.5              |
| S80T40  | 40.2 ± 4.1              |
| S100T40 | 42.1 ± 0.9              |
| S80Tn   | 38.8 ± 2.8              |
| S80T60  | 37.5 ± 1.8              |
| S80T80  | 38.7 ± 2.4              |
| S80T100 | 38.0 ± 0.7              |
| S80T120 | 45.3 ± 6.2              |
| S80T140 | 44.1 ± 4.2              |

The water contact angle (WCA) on the untreated CA film was significantly higher than those on the CNC sides of the coated films because the CNC was more hydrophilic than CA. The WCA on S40T40 was slightly higher than those on the other coated samples, which is likely the result of its highest surface roughness. Generally, no statistically significant difference in WCA was observed among the other coated samples.



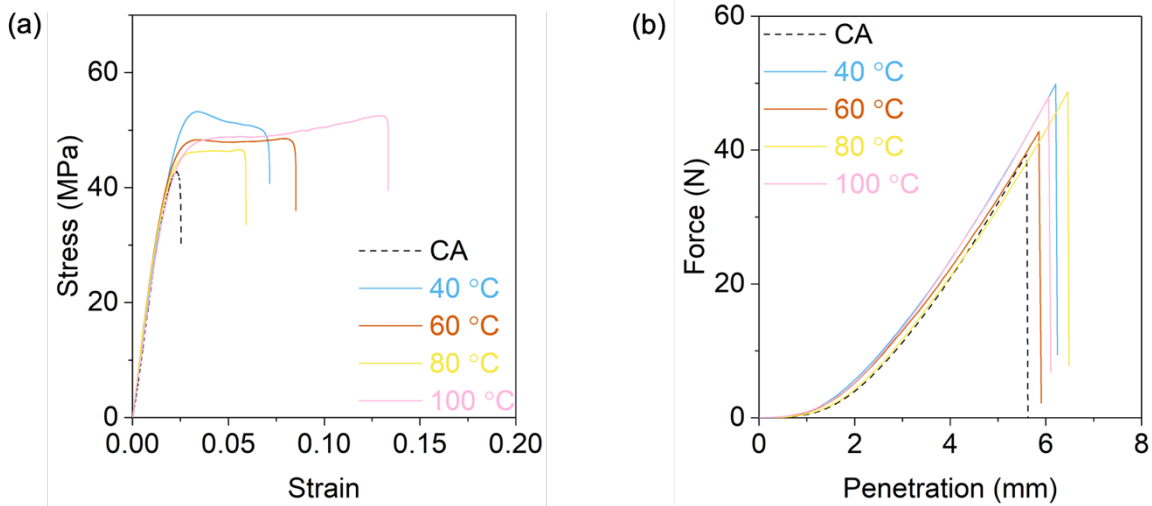

**Figure S4. Selected stress-strain curves (a) and force-penetration (b) for untreated CA and coated CA films with different spray coating temperatures.**

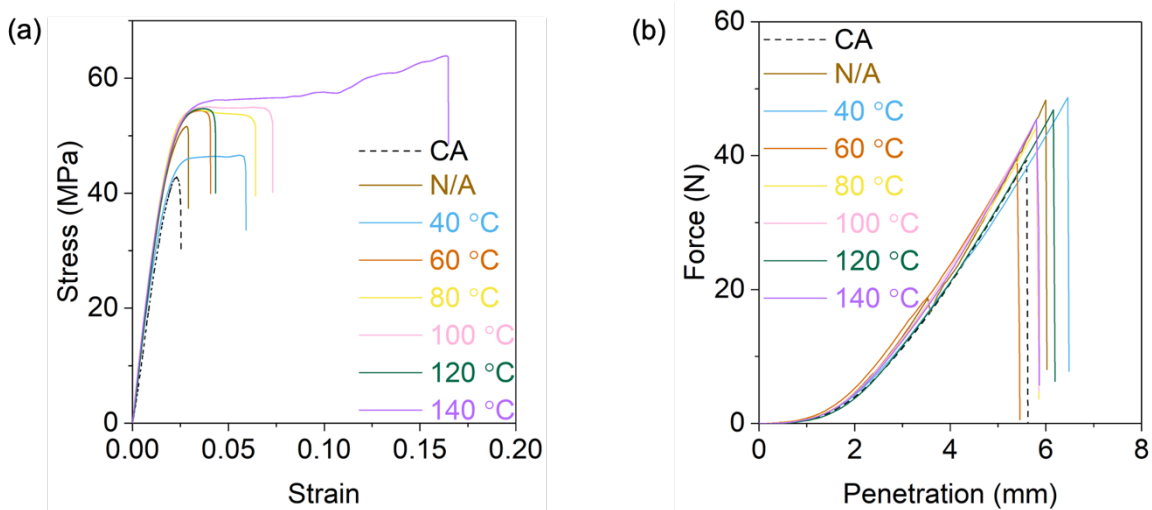

**Figure S5. Selected stress-strain curves (a) and force-penetration (b) for untreated CA and coated CA films with different thermal treatment temperatures.**

**Table S8. Two tailed P-values for mean breaking force. Values in red indicate the difference in means between the two samples being compared is significant ( $\alpha = 0.05$ ).**

| P-value | CA     | S40<br>T40 | S60<br>T40 | S80<br>T40 | S100<br>T40 | S80<br>Tn | S80<br>T60 | S80<br>T80 | S80<br>T100 | S80<br>T120 | S80<br>T140 |
|---------|--------|------------|------------|------------|-------------|-----------|------------|------------|-------------|-------------|-------------|
| CA      | 1.00   |            |            |            |             |           |            |            |             |             |             |
| S40T40  | 0.01   | 1.00       |            |            |             |           |            |            |             |             |             |
| S60T40  | 0.03   | 0.30       | 1.00       |            |             |           |            |            |             |             |             |
| S80T40  | 0.001  | 0.88       | 0.37       | 1.00       |             |           |            |            |             |             |             |
| S100T40 | 0.09   | 0.57       | 0.88       | 0.64       | 1.00        |           |            |            |             |             |             |
| S80Tn   | 0.0004 | 0.93       | 0.31       | 0.94       | 0.60        | 1.00      |            |            |             |             |             |
| S80T60  | 0.14   | 0.03       | 0.11       | 0.02       | 0.21        | 0.02      | 1.00       |            |             |             |             |
| S80T80  | 0.01   | 0.06       | 0.40       | 0.06       | 0.50        | 0.03      | 0.21       | 1.00       |             |             |             |
| S80T100 | 0.004  | 0.13       | 0.79       | 0.17       | 0.74        | 0.09      | 0.10       | 0.35       | 1.00        |             |             |
| S80T120 | 0.004  | 0.98       | 0.27       | 0.85       | 0.56        | 0.90      | 0.02       | 0.03       | 0.09        | 1.00        |             |
| S80T140 | 0.02   | 0.30       | 0.89       | 0.39       | 0.94        | 0.31      | 0.08       | 0.27       | 0.63        | 0.26        | 1.00        |
| CAS40   | 0.001  | 0.03       |            |            |             |           |            |            |             |             |             |
| CAS60   | 0.003  |            | 0.08       |            |             |           |            |            |             |             |             |
| CAS80   | 0.004  |            |            | 0.004      |             | 0.01      | 0.54       | 0.045      | 0.03        | 0.02        | 0.048       |
| CAS100  | 0.001  |            |            |            | 0.23        |           |            |            |             |             |             |
| CAT40   | 0.051  | 0.02       | 0.11       | 0.01       | 0.22        |           |            |            |             |             |             |
| CAT60   | 0.70   |            |            |            |             |           | 0.54       |            |             |             |             |
| CAT80   | 0.03   |            |            |            |             |           |            | 0.11       |             |             |             |
| CAT100  | 0.001  |            |            |            |             |           |            |            | 0.03        |             |             |
| CAT120  | 0.04   |            |            |            |             |           |            |            |             | 0.01        |             |
| CAT140  | 0.02   |            |            |            |             |           |            |            |             |             | 0.04        |

**Table S8. (continued)**

| P-value | CA<br>S40 | CA<br>S60 | CA<br>S80 | CA<br>S100 | CA<br>T40 | CA<br>T60 | CA<br>T80 | CA<br>T100 | CA<br>T120 | CA<br>T140 |
|---------|-----------|-----------|-----------|------------|-----------|-----------|-----------|------------|------------|------------|
| CAS40   | 1.00      |           |           |            |           |           |           |            |            |            |
| CAS60   | 0.005     | 1.00      |           |            |           |           |           |            |            |            |
| CAS80   | 0.003     | 0.24      | 1.00      |            |           |           |           |            |            |            |
| CAS100  | 0.42      | 0.08      | 0.06      | 1.00       |           |           |           |            |            |            |
| CAT40   | 0.16      | 0.48      | 0.62      | 0.09       | 1.00      |           |           |            |            |            |
| CAT60   | 0.54      | 0.70      | 0.73      | 0.48       | 0.82      | 1.00      |           |            |            |            |
| CAT80   | 0.72      | 0.32      | 0.27      | 1.00       | 0.20      | 0.49      | 1.00      |            |            |            |
| CAT100  | 0.68      | 0.13      | 0.09      | 0.78       | 0.12      | 0.51      | 0.88      | 1.00       |            |            |
| CAT120  | 0.61      | 0.70      | 0.58      | 0.41       | 0.43      | 0.63      | 0.52      | 0.51       | 1.00       |            |
| CAT140  | 0.29      | 0.99      | 0.81      | 0.17       | 0.57      | 0.70      | 0.34      | 0.24       | 0.74       | 1.00       |

**Table S9. Two tailed P-values for mean modulus. Values in red indicate the difference in means between the two samples being compared is significant ( $\alpha = 0.05$ ).**

| P-value | CA           | S40<br>T40  | S60<br>T40  | S80<br>T40    | S100<br>T40  | S80<br>Tn   | S80<br>T60 | S80<br>T80 | S80<br>T100 | S80<br>T120 | S80<br>T140 |
|---------|--------------|-------------|-------------|---------------|--------------|-------------|------------|------------|-------------|-------------|-------------|
| CA      | 1.00         |             |             |               |              |             |            |            |             |             |             |
| S40T40  | 0.77         | 1.00        |             |               |              |             |            |            |             |             |             |
| S60T40  | 0.19         | 0.39        | 1.00        |               |              |             |            |            |             |             |             |
| S80T40  | 0.13         | 0.27        | 0.67        | 1.00          |              |             |            |            |             |             |             |
| S100T40 | 0.82         | 0.91        | 0.17        | 0.10          | 1.00         |             |            |            |             |             |             |
| S80Tn   | <b>0.01</b>  | <b>0.04</b> | <b>0.01</b> | <b>0.02</b>   | <b>0.004</b> | 1.00        |            |            |             |             |             |
| S80T60  | <b>0.02</b>  | 0.06        | <b>0.03</b> | <b>0.0497</b> | <b>0.01</b>  | 0.30        | 1.00       |            |             |             |             |
| S80T80  | <b>0.01</b>  | 0.052       | <b>0.02</b> | 0.052         | <b>0.01</b>  | 0.46        | 0.84       | 1.00       |             |             |             |
| S80T100 | <b>0.02</b>  | 0.07        | <b>0.04</b> | 0.10          | <b>0.01</b>  | 0.17        | 0.49       | 0.49       | 1.00        |             |             |
| S80T120 | <b>0.048</b> | 0.13        | 0.22        | 0.43          | <b>0.03</b>  | 0.10        | 0.23       | 0.22       | 0.39        | 1.00        |             |
| S80T140 | 0.07         | 0.14        | 0.30        | 0.47          | 0.07         | 0.30        | 0.52       | 0.48       | 0.68        | 0.88        | 1.00        |
| CAS40   | <b>0.02</b>  | 0.06        |             |               |              |             |            |            |             |             |             |
| CAS60   | <b>0.02</b>  |             | 0.06        |               |              |             |            |            |             |             |             |
| CAS80   | 0.06         |             |             | 0.52          |              | <b>0.04</b> | 0.10       | 0.10       | 0.19        | 0.81        | 0.74        |
| CAS100  | 0.11         |             |             |               | 0.08         |             |            |            |             |             |             |
| CAT40   | 0.05         | 0.08        | 0.09        | 0.20          | <b>0.02</b>  |             |            |            |             |             |             |
| CAT60   | <b>0.02</b>  |             |             |               |              |             | 0.34       |            |             |             |             |
| CAT80   | <b>0.03</b>  |             |             |               |              |             |            | 0.16       |             |             |             |
| CAT100  | <b>0.03</b>  |             |             |               |              |             |            |            | 0.80        |             |             |
| CAT120  | 0.11         |             |             |               |              |             |            |            |             | 0.28        |             |
| CAT140  | <b>0.04</b>  |             |             |               |              |             |            |            |             |             | 0.93        |

**Table S9. (continued)**

| P-value | CA<br>S40     | CA<br>S60 | CA<br>S80 | CA<br>S100  | CA<br>T40 | CA<br>T60   | CA<br>T80    | CA<br>T100 | CA<br>T120 | CA<br>T140 |
|---------|---------------|-----------|-----------|-------------|-----------|-------------|--------------|------------|------------|------------|
| CAS40   | 1.00          |           |           |             |           |             |              |            |            |            |
| CAS60   | 0.73          | 1.00      |           |             |           |             |              |            |            |            |
| CAS80   | 0.10          | 0.26      | 1.00      |             |           |             |              |            |            |            |
| CAS100  | <b>0.0002</b> | 0.06      | 0.29      | 1.00        |           |             |              |            |            |            |
| CAT40   | <b>0.04</b>   | 0.27      | 0.83      | 0.08        | 1.00      |             |              |            |            |            |
| CAT60   | 0.33          | 0.86      | 0.22      | <b>0.01</b> | 0.14      | 1.00        |              |            |            |            |
| CAT80   | <b>0.04</b>   | 0.51      | 0.40      | <b>0.00</b> | 0.34      | 0.38        | 1.00         |            |            |            |
| CAT100  | 0.53          | 0.79      | 0.40      | 0.11        | 0.44      | 0.88        | 0.77         | 1.00       |            |            |
| CAT120  | <b>0.0003</b> | 0.06      | 0.29      | 0.999       | 0.08      | <b>0.01</b> | <b>0.003</b> | 0.11       | 1.00       |            |
| CAT140  | 0.15          | 0.41      | 0.68      | 0.13        | 0.78      | 0.37        | 0.68         | 0.60       | 0.13       | 1.00       |

**Table S10. Two tailed P-values for mean yield stress. Values in red indicate the difference in means between the two samples being compared is significant ( $\alpha = 0.05$ ).**

| P-value | CA    | S40<br>T40 | S60<br>T40 | S80<br>T40 | S100<br>T40 | S80<br>Tn | S80<br>T60 | S80<br>T80 | S80<br>T100 | S80<br>T120 | S80<br>T140 |
|---------|-------|------------|------------|------------|-------------|-----------|------------|------------|-------------|-------------|-------------|
| CA      | 1.00  |            |            |            |             |           |            |            |             |             |             |
| S40T40  | 0.10  | 1.00       |            |            |             |           |            |            |             |             |             |
| S60T40  | 0.14  | 0.55       | 1.00       |            |             |           |            |            |             |             |             |
| S80T40  | 0.055 | 0.78       | 0.26       | 1.00       |             |           |            |            |             |             |             |
| S100T40 | 0.04  | 0.58       | 0.06       | 0.76       | 1.00        |           |            |            |             |             |             |
| S80Tn   | 0.01  | 0.046      | 0.03       | 0.052      | 0.07        | 1.00      |            |            |             |             |             |
| S80T60  | 0.01  | 0.12       | 0.003      | 0.07       | 0.03        | 0.21      | 1.00       |            |             |             |             |
| S80T80  | 0.01  | 0.10       | 0.004      | 0.06       | 0.04        | 0.27      | 0.72       | 1.00       |             |             |             |
| S80T100 | 0.01  | 0.11       | 0.01       | 0.09       | 0.08        | 0.25      | 0.85       | 0.91       | 1.00        |             |             |
| S80T120 | 0.01  | 0.13       | 0.01       | 0.11       | 0.09        | 0.21      | 0.96       | 0.73       | 0.84        | 1.00        |             |
| S80T140 | 0.08  | 0.49       | 0.31       | 0.58       | 0.65        | 0.32      | 0.81       | 0.73       | 0.77        | 0.83        | 1.00        |
| CAS40   | 0.003 | 0.02       |            |            |             |           |            |            |             |             |             |
| CAS60   | 0.002 |            | 0.0001     |            |             |           |            |            |             |             |             |
| CAS80   | 0.01  |            |            | 0.003      |             | 0.78      | 0.01       | 0.07       | 0.09        | 0.053       | 0.35        |
| CAS100  | 0.01  |            |            |            | 0.11        |           |            |            |             |             |             |
| CAT40   | 0.01  | 0.01       | 0.005      | 0.01       | 0.01        |           |            |            |             |             |             |
| CAT60   | 0.004 |            |            |            |             |           | 0.04       |            |             |             |             |
| CAT80   | 0.004 |            |            |            |             |           |            | 0.04       |             |             |             |
| CAT100  | 0.002 |            |            |            |             |           |            |            | 0.07        |             |             |
| CAT120  | 0.005 |            |            |            |             |           |            |            |             | 0.24        |             |
| CAT140  | 0.001 |            |            |            |             |           |            |            |             |             | 0.12        |

**Table S10. (continued)**

| P-value | CA<br>S40 | CA<br>S60 | CA<br>S80 | CA<br>S100 | CA<br>T40 | CA<br>T60 | CA<br>T80 | CA<br>T100 | CA<br>T120 | CA<br>T140 |
|---------|-----------|-----------|-----------|------------|-----------|-----------|-----------|------------|------------|------------|
| CAS40   | 1.00      |           |           |            |           |           |           |            |            |            |
| CAS60   | 0.36      | 1.00      |           |            |           |           |           |            |            |            |
| CAS80   | 0.58      | 0.01      | 1.00      |            |           |           |           |            |            |            |
| CAS100  | 0.49      | 0.18      | 0.71      | 1.00       |           |           |           |            |            |            |
| CAT40   | 0.30      | 0.02      | 0.36      | 0.86       | 1.00      |           |           |            |            |            |
| CAT60   | 0.77      | 0.10      | 0.71      | 0.60       | 0.31      | 1.00      |           |            |            |            |
| CAT80   | 0.79      | 0.04      | 0.54      | 0.55       | 0.23      | 0.94      | 1.00      |            |            |            |
| CAT100  | 0.73      | 0.61      | 0.34      | 0.33       | 0.18      | 0.49      | 0.49      | 1.00       |            |            |
| CAT120  | 0.54      | 0.13      | 0.80      | 0.90       | 0.71      | 0.66      | 0.60      | 0.35       | 1.00       |            |
| CAT140  | 0.33      | 0.74      | 0.12      | 0.15       | 0.06      | 0.18      | 0.17      | 0.51       | 0.14       | 1.00       |

**Table S11. Two tailed P-values for mean strain at break. Values in red indicate the difference in means between the two samples being compared is significant ( $\alpha = 0.05$ ).**

| P-value | CA   | S40<br>T40 | S60<br>T40 | S80<br>T40 | S100<br>T40 | S80<br>Tn | S80<br>T60 | S80<br>T80 | S80<br>T100 | S80<br>T120 | S80<br>T140 |
|---------|------|------------|------------|------------|-------------|-----------|------------|------------|-------------|-------------|-------------|
| CA      | 1.00 |            |            |            |             |           |            |            |             |             |             |
| S40T40  | 0.17 | 1.00       |            |            |             |           |            |            |             |             |             |
| S60T40  | 0.17 | 0.98       | 1.00       |            |             |           |            |            |             |             |             |
| S80T40  | 0.11 | 0.37       | 0.38       | 1.00       |             |           |            |            |             |             |             |
| S100T40 | 0.02 | 0.21       | 0.20       | 0.03       | 1.00        |           |            |            |             |             |             |
| S80Tn   | 0.81 | 0.17       | 0.18       | 0.13       | 0.02        | 1.00      |            |            |             |             |             |
| S80T60  | 0.72 | 0.18       | 0.18       | 0.12       | 0.02        | 0.95      | 1.00       |            |             |             |             |
| S80T80  | 0.11 | 0.75       | 0.73       | 0.23       | 0.36        | 0.12      | 0.12       | 1.00       |             |             |             |
| S80T100 | 0.11 | 0.54       | 0.56       | 0.58       | 0.0504      | 0.12      | 0.13       | 0.35       | 1.00        |             |             |
| S80T120 | 0.27 | 0.20       | 0.21       | 0.21       | 0.03        | 0.39      | 0.20       | 0.14       | 0.17        | 1.00        |             |
| S80T140 | 0.13 | 0.64       | 0.62       | 0.24       | 0.53        | 0.14      | 0.14       | 0.86       | 0.33        | 0.16        | 1.00        |
| CAS40   | 0.95 | 0.17       |            |            |             |           |            |            |             |             |             |
| CAS60   | 0.22 |            | 0.22       |            |             |           |            |            |             |             |             |
| CAS80   | 0.15 |            |            | 0.38       |             | 0.21      | 0.16       | 0.16       | 0.24        | 0.42        | 0.18        |
| CAS100  | 0.90 |            |            |            | 0.02        |           |            |            |             |             |             |
| CAT40   | 0.86 | 0.28       | 0.29       | 0.65       | 0.02        |           |            |            |             |             |             |
| CAT60   | 0.24 |            |            |            |             |           | 0.28       |            |             |             |             |
| CAT80   | 0.07 |            |            |            |             |           |            | 0.16       |             |             |             |
| CAT100  | 0.39 |            |            |            |             |           |            |            | 0.38        |             |             |
| CAT120  | 0.76 |            |            |            |             |           |            |            |             | 0.44        |             |
| CAT140  | 0.16 |            |            |            |             |           |            |            |             |             | 0.17        |

**Table S11. (continued)**

| P-value | CA<br>S40 | CA<br>S60 | CA<br>S80 | CA<br>S100 | CA<br>T40 | CA<br>T60 | CA<br>T80 | CA<br>T100 | CA<br>T120 | CA<br>T140 |
|---------|-----------|-----------|-----------|------------|-----------|-----------|-----------|------------|------------|------------|
| CAS40   | 1.00      |           |           |            |           |           |           |            |            |            |
| CAS60   | 0.20      | 1.00      |           |            |           |           |           |            |            |            |
| CAS80   | 0.14      | 0.60      | 1.00      |            |           |           |           |            |            |            |
| CAS100  | 0.81      | 0.08      | 0.09      | 1.00       |           |           |           |            |            |            |
| CAT40   | 0.77      | 0.07      | 0.08      | 0.93       | 1.00      |           |           |            |            |            |
| CAT60   | 0.25      | 0.40      | 0.50      | 0.23       | 0.23      | 1.00      |           |            |            |            |
| CAT80   | 0.06      | 0.33      | 0.89      | 0.004      | 0.01      | 0.52      | 1.00      |            |            |            |
| CAT100  | 0.40      | 0.67      | 0.83      | 0.36       | 0.35      | 0.68      | 0.87      | 1.00       |            |            |
| CAT120  | 0.79      | 0.35      | 0.23      | 0.61       | 0.58      | 0.28      | 0.12      | 0.45       | 1.00       |            |
| CAT140  | 0.15      | 0.65      | 0.93      | 0.08       | 0.08      | 0.48      | 0.79      | 0.80       | 0.24       | 1.00       |

**Table S12. Mechanical properties of uncoated CA films treated under different conditions.**

| Sample | $T_{\text{spray}}$ (°C) | $T_{\text{thermal}}$ (°C) | $F_B^a$ (N)    | $E^a$ (GPa)     | $\sigma_y^a$ (MPa) | $\varepsilon_B^a$ (%) |
|--------|-------------------------|---------------------------|----------------|-----------------|--------------------|-----------------------|
| CA     | -                       | -                         | $38.5 \pm 0.8$ | $2.39 \pm 0.25$ | $42.9 \pm 5.9$     | $3.3 \pm 1.0$         |
| CAS40  | 40                      | -                         | $41.5 \pm 0.2$ | $2.81 \pm 0.03$ | $57.6 \pm 3.5$     | $3.3 \pm 0.8$         |
| CAS60  | 60                      | -                         | $40.8 \pm 0.1$ | $2.78 \pm 0.12$ | $59.6 \pm 1.3$     | $4.0 \pm 0.6$         |
| CAS80  | 80                      | -                         | $40.7 \pm 0.1$ | $2.68 \pm 0.11$ | $56.5 \pm 1.0$     | $4.4 \pm 0.9$         |
| CAS100 | 100                     | -                         | $41.9 \pm 0.5$ | $2.61 \pm 0.04$ | $55.6 \pm 3.4$     | $3.2 \pm 0.4$         |
| CAT40  | -                       | 40                        | $40.4 \pm 0.9$ | $2.70 \pm 0.07$ | $55.2 \pm 2.3$     | $3.2 \pm 0.4$         |
| CAT60  | -                       | 60                        | $39.7 \pm 4.4$ | $2.77 \pm 0.06$ | $56.9 \pm 2.2$     | $5.6 \pm 3.1$         |
| CAT80  | -                       | 80                        | $41.8 \pm 1.3$ | $2.74 \pm 0.04$ | $57.0 \pm 1.4$     | $4.4 \pm 0.4$         |
| CAT100 | -                       | 100                       | $41.7 \pm 0.6$ | $2.76 \pm 0.13$ | $58.5 \pm 3.6$     | $4.7 \pm 2.7$         |
| CAT120 | -                       | 120                       | $41.1 \pm 1.2$ | $2.61 \pm 0.04$ | $56.0 \pm 3.5$     | $3.5 \pm 0.9$         |
| CAT140 | -                       | 140                       | $40.8 \pm 0.9$ | $2.72 \pm 0.10$ | $60.2 \pm 3.6$     | $4.3 \pm 0.9$         |

<sup>a</sup> The breaking force ( $F_B$ ) was measured by a puncture testing (ASTM F1306). The modulus ( $E$ ), yield stress ( $\sigma_y$ ), strain at break ( $\varepsilon_B$ ) values were obtained by a microtensile testing (ASTM D1708).

### Supplementary analysis on mechanical properties

To separate the influences of the ChNW-CNC coating and the CA substrate on the mechanical properties, CA films were either sprayed with water or thermally treated at different temperatures and then characterized. It is shown in **Table S10** that the mechanical properties of treated CA were improved in comparison to untreated CA. The values of modulus, yield stress, and breaking force for CAS40 to CAS100 samples were on average 14%, 37%, and 7% higher than those of untreated CA, respectively, while the strain at break values were not significantly changed. Similar results were found for CAT40 to CAT140 samples. This is hypothesized to be the result of physical aging.

Furthermore, by comparing coated films with treated CA films, the values of modulus and the strain at break for relevant samples, e.g., S40T60 versus CAS40 and CAT60, were generally not significantly different. This also suggests the dominant role of the CA substrate on the mechanical properties. Overall, the yield stress values for coated films were lower than those of

treated CA films, but the breaking force values showed the opposite trend, which verifies that the ChNW-CNC coating resulted in an improvement in the mechanical properties.

**Table S13. Mechanical properties of common plastics for food packaging applications versus the coated film S80T140.**

| Sample                                    | $E$ (GPa)       | $\sigma_y$ (MPa) | $\varepsilon_B$ (%) |
|-------------------------------------------|-----------------|------------------|---------------------|
| PE, low-density, film grade <sup>7</sup>  | 0.14 - 0.48     | 8 - 22           | 50 - 1000           |
| PE, high-density, film grade <sup>7</sup> | 0.02 - 1.35     | 2.69 - 200       | 350 - 1700          |
| PS, extrusion grade <sup>7</sup>          | 1.65 - 3.4      | 5.2 - 52.4       | 1 - 70              |
| PP, film grade <sup>7</sup>               | 0.7 - 7.51      | 3.38 - 42.1      | 8 - 900             |
| PVC, flexible grade <sup>7</sup>          | 0.006-3.23      | 0.12-50          | 16-700              |
| PLA <sup>7</sup>                          | 0.05-13.8       | 8-103            | 0.5-700             |
| PET, unreinforced <sup>7</sup>            | 1.57 - 5.2      | 5.52 - 90        | 4 - 600             |
| EVOH <sup>7</sup>                         | 1.08 - 3.1      | 43 - 94          | 130-330             |
| CA                                        | $2.39 \pm 0.25$ | $42.9 \pm 5.9$   | $3.3 \pm 1.0$       |
| S80T140                                   | $2.73 \pm 0.22$ | $60.2 \pm 3.6$   | $11.3 \pm 7.9$      |

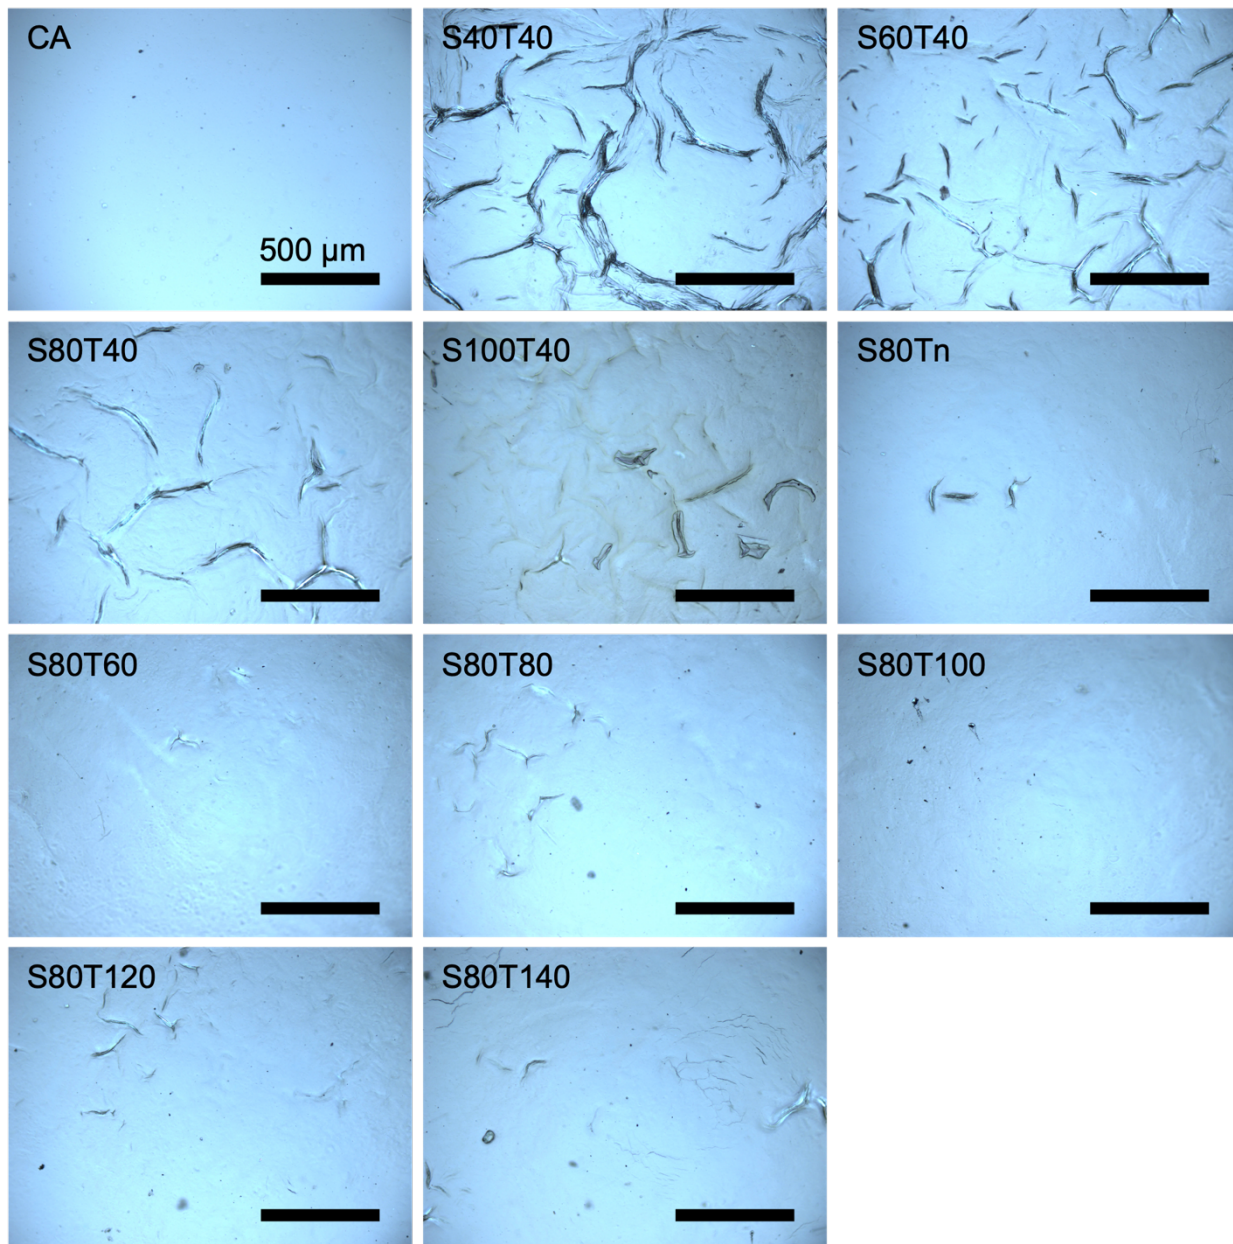

**Figure S6. Optical microscope images for untreated CA and coated CA films. Scale bars: 500 μm.**



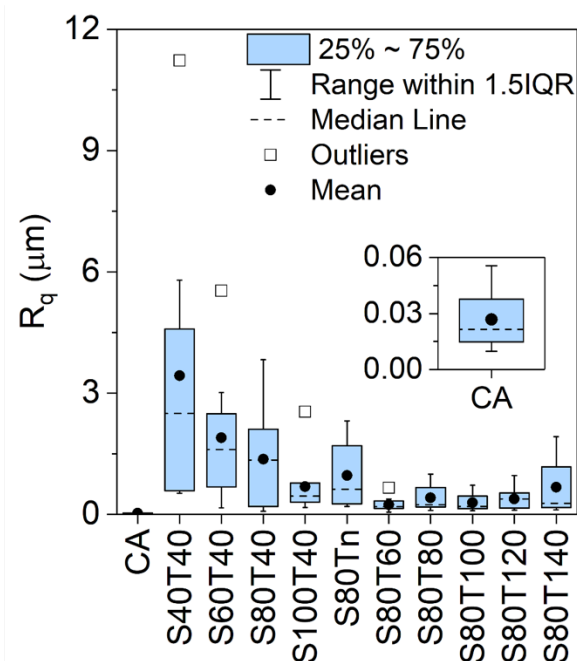

**Figure S7. Root-mean-square roughness of surfaces of the untreated CA and coated CA films determined by profilometry. The inset zooms in on the roughness distribution of the untreated CA. The interquartile range (IQR) is the distance between the upper (75%) and lower (25%) quartiles of the dataset.**

**Table S14. Optical properties of common plastics for food packaging applications versus the coated film S80T140.**

| Film                                      | Transmittance (%) | Haze (%) |
|-------------------------------------------|-------------------|----------|
| PE, low-density, film grade <sup>7</sup>  | 55-90             | 1.1-55   |
| PE, high-density, film grade <sup>7</sup> | -                 | 4.0-81   |
| PS, molded, unreinforced <sup>7</sup>     | 1-92              | 0.35-88  |
| PP, film grade <sup>7</sup>               | 0.2-90            | 0.1-90   |
| PVC, flexible grade <sup>7</sup>          | 80-90             | 2.5-14.3 |
| PLA <sup>7</sup>                          | 90                | 2.0-85   |
| PET, unreinforced <sup>7</sup>            | 67-99             | 0.3-40   |
| CA                                        | 92                | 1        |
| S80T140                                   | 84                | 3        |

## References

1. Technical information for cellulose acetate, Daicel Corp. [https://www.daicel.com/cell\\_ac/en/detail/index.html](https://www.daicel.com/cell_ac/en/detail/index.html) (accessed 2022-07-04).
2. Ji, Y.; Waters, S.; Lim, E.; Lang, A. W.; Ciesielski, P. N.; Shofner, M. L.; Reynolds, J. R.; Meredith, J. C., Minimizing Oxygen Permeability in Chitin/Cellulose Nanomaterial Coatings by Tuning Chitin Deacetylation. *ACS Sustain. Chem. Eng.* **2022**, *10* (1), 124-133. DOI: 10.1021/acssuschemeng.1c05051

3. Liao, J. S.; Pham, K. A.; Breedveld, V., Rheological characterization and modeling of cellulose nanocrystal and TEMPO-oxidized cellulose nanofibril suspensions. *Cellulose* **2020**, *27* (7), 3741-3757. DOI:
4. Lange, J.; Wyser, Y., Recent innovations in barrier technologies for plastic packaging - a review. *Packag. Technol. Sci.* **2003**, *16* (4), 149-158. DOI: 10.1002/pts.621
5. Satam, C. C.; Irvin, C. W.; Lang, A. W.; Jallorina, J. C. R.; Shofner, M. L.; Reynolds, J. R.; Meredith, J. C., Spray-Coated Multilayer Cellulose Nanocrystal-Chitin Nanofiber Films for Barrier Applications. *ACS Sustain. Chem. Eng.* **2018**, *6* (8), 10637-10644. DOI: 10.1021/acssuschemeng.8b01536
6. Muller, J.; Gonzalez-Martinez, C.; Chiralt, A., Poly(lactic) acid (PLA) and starch bilayer films, containing cinnamaldehyde, obtained by compression moulding. *Eur. Polym. J.* **2017**, *95*, 56-70. DOI: 10.1016/j.eurpolymj.2017.07.019
7. MatWeb: Online Materials Information Resource, <http://www.matweb.com> (accessed 2022-05-05).
